# Supplementary material for: Design, synthesis, crystal structure, in vitro cytotoxicity evaluation, density functional theory calculations and docking studies of 2-(benzamido) benzohydrazide derivatives as potent AChE and BChE inhibitors
Source: Royal Society of Chemistry journal article supplement (doi:10.1039/d1ra07221h), 2021-12-24
Supplement: d1ra07221h1.pdf [file d1ra07221h1.pdf]

## **Design, Synthesis, Crystal Structure, in vitro cytotoxicity evaluation, Density Functional Theory calculations and docking studies of 2-(benzamido) benzohydrazide derivatives as Potent AChE and BChE inhibitors:**

Naghmana Kausar <sup>a\*</sup>, Shahzad Murtaza <sup>a\*</sup>, Muhammad Nadeem Arshad <sup>b, c</sup>, Rahman Shah Zaib Saleem <sup>d</sup>, Abdullah M. Asiri <sup>b, c</sup>, Samia Kausar <sup>a</sup>, Ataf Ali Altaf <sup>e</sup>, Adina Tauqir <sup>a</sup>, Ashraf Y. Elnaggar <sup>f</sup>, Salah M. El-Bahy <sup>g</sup>

<sup>a</sup> *Department of Chemistry, University of Gujrat, 50700, Gujrat, Pakistan.*

<sup>b</sup> *Chemistry Department, Faculty of Science, King Abdulaziz University, P. O. Box 80203, Jeddah 21589, Saudi Arabia.*

<sup>c</sup> *Center of Excellence for Advanced Materials Research (CEAMR), King Abdulaziz University, P. O. Box 80203, Jeddah 21589, Saudi Arabia*

<sup>d</sup> *Lahore University of Management Sciences (LUMS), Lahore, Pakistan.*

<sup>e</sup> *Department of Chemistry, University of Okara, Okara 56300, Pakistan.*

<sup>f</sup> *Department of Food Nutrition Science, College of Science, Taif University, Taif 21944, P. O. Box 11099, Saudi Arabia.*

<sup>g</sup> *Department of Chemistry, Turabah University College, Taif University Taif 21944, P. O. Box 11099, Saudi Arabia.*

Corresponding Author:

Dr. Naghmana Kausar

Faculty of Science, University of Gujrat, Gujrat, Pakistan

Email: [naghmana.kousar@uog.edu.pk](mailto:naghmana.kousar@uog.edu.pk)

### Spectral data of Methyl 2-benzamidobenzoate (3)

M.F: C<sub>15</sub>H<sub>13</sub>NO<sub>3</sub>; Yield: 75%; m.p. 104±1°C; <sup>1</sup>H-NMR (300 MHz, DMSO-*d*<sub>6</sub>): δ = 11.17 (1H, br, s, NHCO), 7.35-8.38 (9H, m, Aromatic CH), 3.47 (3H, s, CH<sub>3</sub>O). <sup>13</sup>C NMR (75 MHz, DMSO-*d*<sub>6</sub>): δ = 167.6 (COO), 165.9 (CONH), 142.6, 138.4, 135.7 (2), 131.5 (2), 129.3, 126.8 (2), 124.7, 121.6, 120.5 (benzene rings), 52.6 (CH<sub>3</sub>O). FTIR (cm<sup>-1</sup>): 3263 (NH, stretch), 3023 (C-H Stretch), 1691 (ester C=O, stretch), 1667 (C=O, stretch), 1267 (C-O, stretch). MS (ESI): m/z (%), (254 (30), [M]<sup>-</sup>), 224(12), 196 (24), 178 (27).

### Spectral data of *N*-(2-(hydrazinecarbonyl)phenyl)benzamide (4)

M.F: C<sub>14</sub>H<sub>13</sub>N<sub>3</sub>O<sub>2</sub>; Yield: 71%; m.p. 192±1°C; <sup>1</sup>H-NMR (300 MHz, DMSO-*d*<sub>6</sub>): δ = 12.57 (1H, s, NH-CO), 10.21 (1H, br, NH-NH<sub>2</sub>), 7.17-8.68 (8H, m, Aromatic CH), 4.70 (2H, br, NH<sub>2</sub>, amine). <sup>13</sup>C NMR (75 MHz, DMSO-*d*<sub>6</sub>): δ = 167.9 (CONHNH<sub>2</sub>), 164.6 (NHCO), 139.7, 134.9, 132.5 (2), 129.4 (2), 128.1, 127.4 (2), 123.3, 120.6, 119.5 (benzene rings). FTIR (cm<sup>-1</sup>): 3316 (NH<sub>2</sub> stretch), 3204 (CON-H, Stretch), 3054 (C-H, stretch), 1646 (C=O, stretch). MS (ESI): m/z (%), 254 (40, [M]<sup>-</sup>), 240 (35), 236 (11), 196(10).

**Table S1: Bond Lengths for compound 10**

| Table S1 Bond Lengths for compound 10 |      |          |      |      |          |
|---------------------------------------|------|----------|------|------|----------|
| Atom                                  | Atom | Length/Å | Atom | Atom | Length/Å |
| C1                                    | C6   | 1.388(3) | C12  | C13  | 1.377(3) |
| C1                                    | N1   | 1.404(3) | C14  | O2   | 1.224(3) |
| C1                                    | C2   | 1.407(3) | C14  | N2   | 1.348(3) |
| C2                                    | C3   | 1.382(3) | C15  | N3   | 1.276(3) |
| C2                                    | C14  | 1.490(3) | C15  | C16  | 1.436(3) |
| C3                                    | C4   | 1.383(3) | C16  | C21  | 1.395(3) |
| C4                                    | C5   | 1.377(3) | C16  | C17  | 1.406(3) |
| C5                                    | C6   | 1.367(3) | C17  | O3   | 1.365(3) |
| C7                                    | O1   | 1.228(2) | C17  | C18  | 1.382(3) |
| C7                                    | N1   | 1.354(2) | C18  | C19  | 1.390(3) |
| C7                                    | C8   | 1.484(3) | C19  | O4   | 1.357(2) |
| C8                                    | C13  | 1.384(3) | C19  | C20  | 1.389(3) |
| C8                                    | C9   | 1.385(3) | C20  | C21  | 1.369(3) |

|     |     |          |     |    |          |
|-----|-----|----------|-----|----|----------|
| C9  | C10 | 1.370(3) | C22 | O5 | 1.397(3) |
| C10 | C11 | 1.372(3) | N2  | N3 | 1.374(2) |
| C11 | C12 | 1.374(4) |     |    |          |

**Table S2: Bond Angles for compound 10**

| <b>Table S2 Bond Angles for compound 10</b> |      |      |            |      |      |      |            |
|---------------------------------------------|------|------|------------|------|------|------|------------|
| Atom                                        | Atom | Atom | Angle/°    | Atom | Atom | Atom | Angle/°    |
| C6                                          | C1   | N1   | 122.06(19) | C12  | C13  | C8   | 120.1(2)   |
| C6                                          | C1   | C2   | 119.2(2)   | O2   | C14  | N2   | 122.47(18) |
| N1                                          | C1   | C2   | 118.68(16) | O2   | C14  | C2   | 123.50(19) |
| C3                                          | C2   | C1   | 118.84(17) | N2   | C14  | C2   | 114.03(19) |
| C3                                          | C2   | C14  | 120.69(18) | N3   | C15  | C16  | 121.7(2)   |
| C1                                          | C2   | C14  | 120.45(18) | C21  | C16  | C17  | 117.46(19) |
| C2                                          | C3   | C4   | 121.2(2)   | C21  | C16  | C15  | 120.1(2)   |
| C5                                          | C4   | C3   | 119.3(2)   | C17  | C16  | C15  | 122.5(2)   |
| C6                                          | C5   | C4   | 120.64(19) | O3   | C17  | C18  | 118.1(2)   |
| C5                                          | C6   | C1   | 120.7(2)   | O3   | C17  | C16  | 120.86(18) |
| O1                                          | C7   | N1   | 123.4(2)   | C18  | C17  | C16  | 121.0(2)   |
| O1                                          | C7   | C8   | 121.47(18) | C17  | C18  | C19  | 119.5(2)   |
| N1                                          | C7   | C8   | 115.09(17) | O4   | C19  | C20  | 122.4(2)   |
| C13                                         | C8   | C9   | 118.7(2)   | O4   | C19  | C18  | 117.0(2)   |
| C13                                         | C8   | C7   | 119.1(2)   | C20  | C19  | C18  | 120.6(2)   |
| C9                                          | C8   | C7   | 122.09(19) | C21  | C20  | C19  | 119.0(2)   |
| C10                                         | C9   | C8   | 120.8(2)   | C20  | C21  | C16  | 122.4(2)   |
| C9                                          | C10  | C11  | 120.3(2)   | C7   | N1   | C1   | 128.60(17) |
| C10                                         | C11  | C12  | 119.6(2)   | C14  | N2   | N3   | 119.55(18) |
| C11                                         | C12  | C13  | 120.6(2)   | C15  | N3   | N2   | 116.58(19) |

**Table S3: Torsion Angles for compound 10**

| <b>Table S3 Torsion Angles for compound 10</b> |    |    |     |             |     |     |     |     |             |  |
|------------------------------------------------|----|----|-----|-------------|-----|-----|-----|-----|-------------|--|
| A                                              | B  | C  | D   | Angle/°     | A   | B   | C   | D   | Angle/°     |  |
| C6                                             | C1 | C2 | C3  | -1.5(3)     | C3  | C2  | C14 | N2  | 33.3(3)     |  |
| N1                                             | C1 | C2 | C3  | 176.44(19)  | C1  | C2  | C14 | N2  | -148.28(19) |  |
| C6                                             | C1 | C2 | C14 | -179.92(19) | N3  | C15 | C16 | C21 | -179.63(19) |  |
| N1                                             | C1 | C2 | C14 | -2.0(3)     | N3  | C15 | C16 | C17 | -0.6(3)     |  |
| C1                                             | C2 | C3 | C4  | 1.0(3)      | C21 | C16 | C17 | O3  | -179.55(19) |  |
| C14                                            | C2 | C3 | C4  | 179.5(2)    | C15 | C16 | C17 | O3  | 1.3(3)      |  |
| C2                                             | C3 | C4 | C5  | 0.1(4)      | C21 | C16 | C17 | C18 | 1.3(3)      |  |
| C3                                             | C4 | C5 | C6  | -0.7(4)     | C15 | C16 | C17 | C18 | -177.80(18) |  |
| C4                                             | C5 | C6 | C1  | 0.3(4)      | O3  | C17 | C18 | C19 | -179.42(19) |  |

|     |     |     |     |            |     |     |     |     |             |
|-----|-----|-----|-----|------------|-----|-----|-----|-----|-------------|
| N1  | C1  | C6  | C5  | -177.0(2)  | C16 | C17 | C18 | C19 | -0.3(3)     |
| C2  | C1  | C6  | C5  | 0.9(3)     | C17 | C18 | C19 | O4  | 178.30(19)  |
| O1  | C7  | C8  | C13 | -24.7(3)   | C17 | C18 | C19 | C20 | -1.4(3)     |
| N1  | C7  | C8  | C13 | 155.54(19) | O4  | C19 | C20 | C21 | -177.77(19) |
| O1  | C7  | C8  | C9  | 152.3(2)   | C18 | C19 | C20 | C21 | 1.9(3)      |
| N1  | C7  | C8  | C9  | -27.4(3)   | C19 | C20 | C21 | C16 | -0.8(3)     |
| C13 | C8  | C9  | C10 | 0.2(3)     | C17 | C16 | C21 | C20 | -0.8(3)     |
| C7  | C8  | C9  | C10 | -176.9(2)  | C15 | C16 | C21 | C20 | 178.35(19)  |
| C8  | C9  | C10 | C11 | -0.3(4)    | O1  | C7  | N1  | C1  | -5.4(4)     |
| C9  | C10 | C11 | C12 | -0.3(4)    | C8  | C7  | N1  | C1  | 174.35(19)  |
| C10 | C11 | C12 | C13 | 1.0(4)     | C6  | C1  | N1  | C7  | -25.9(3)    |
| C11 | C12 | C13 | C8  | -1.0(4)    | C2  | C1  | N1  | C7  | 156.2(2)    |
| C9  | C8  | C13 | C12 | 0.4(3)     | O2  | C14 | N2  | N3  | -1.1(3)     |
| C7  | C8  | C13 | C12 | 177.6(2)   | C2  | C14 | N2  | N3  | 178.73(16)  |
| C3  | C2  | C14 | O2  | -146.8(2)  | C16 | C15 | N3  | N2  | 179.15(17)  |
| C1  | C2  | C14 | O2  | 31.6(3)    | C14 | N2  | N3  | C15 | 179.73(18)  |

## 1H NMR of Compound 5

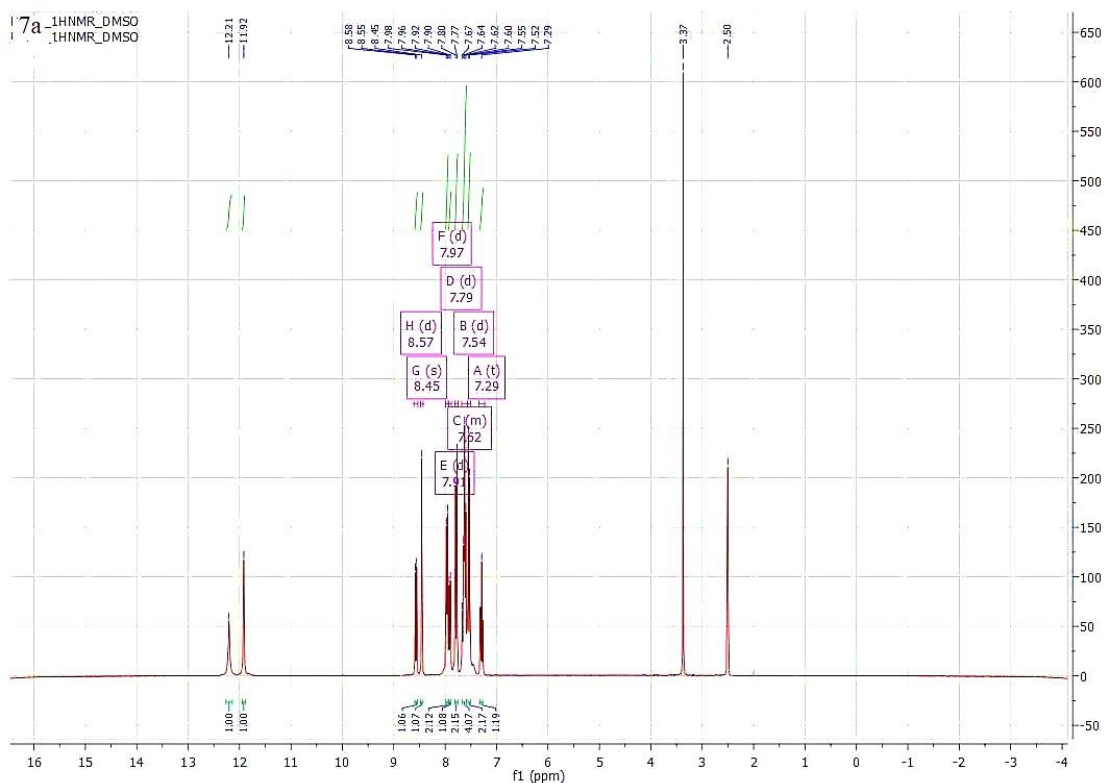

## 1HNMR Compound 5

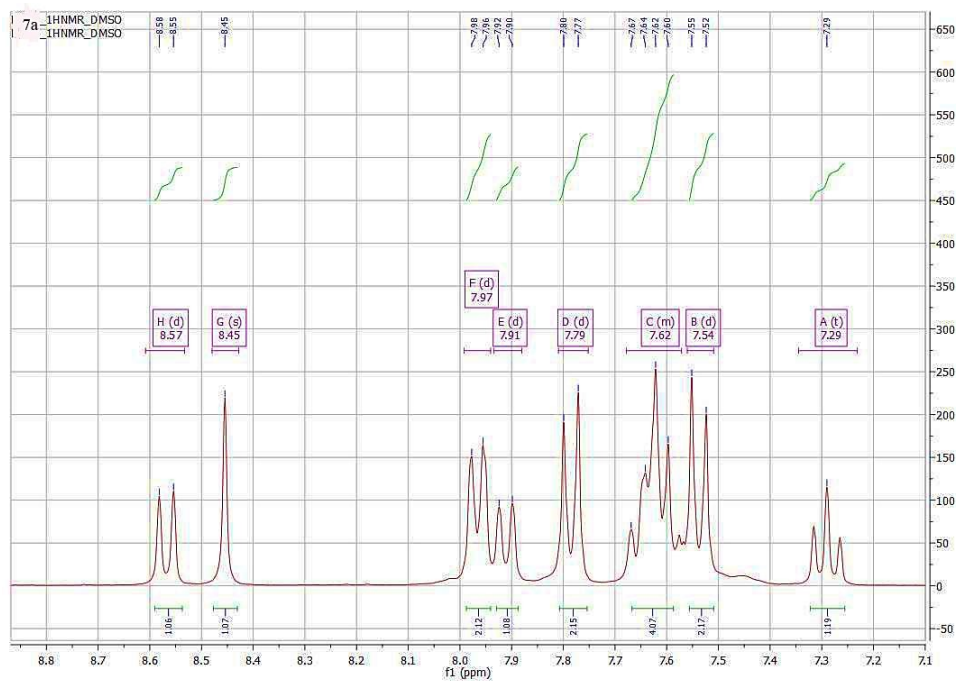

## 1HNMR Compound 6

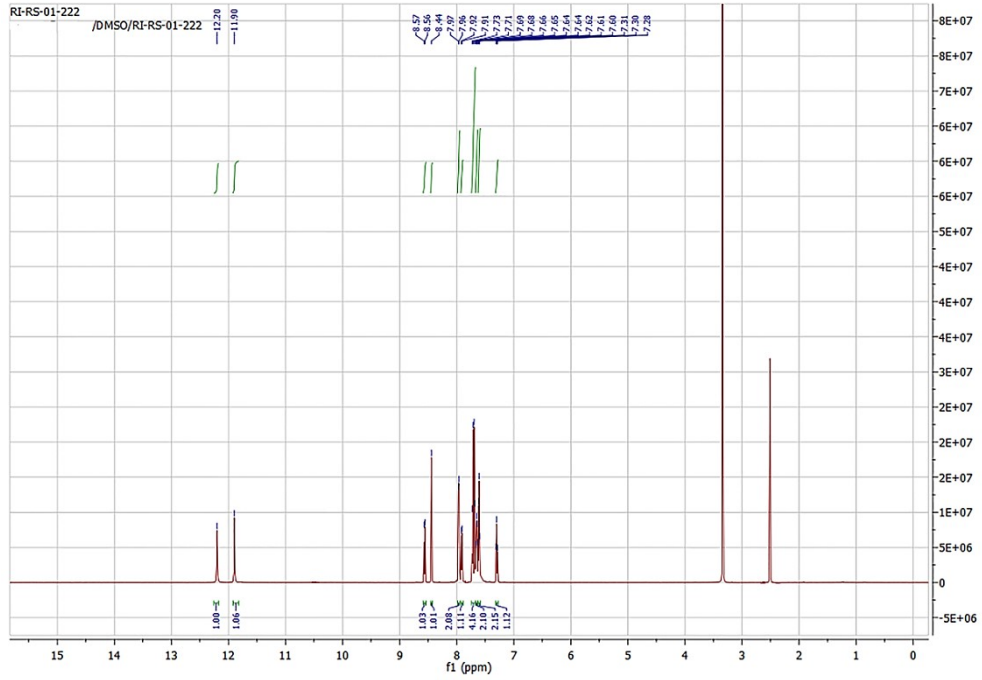

**1HNMR Compound 6**

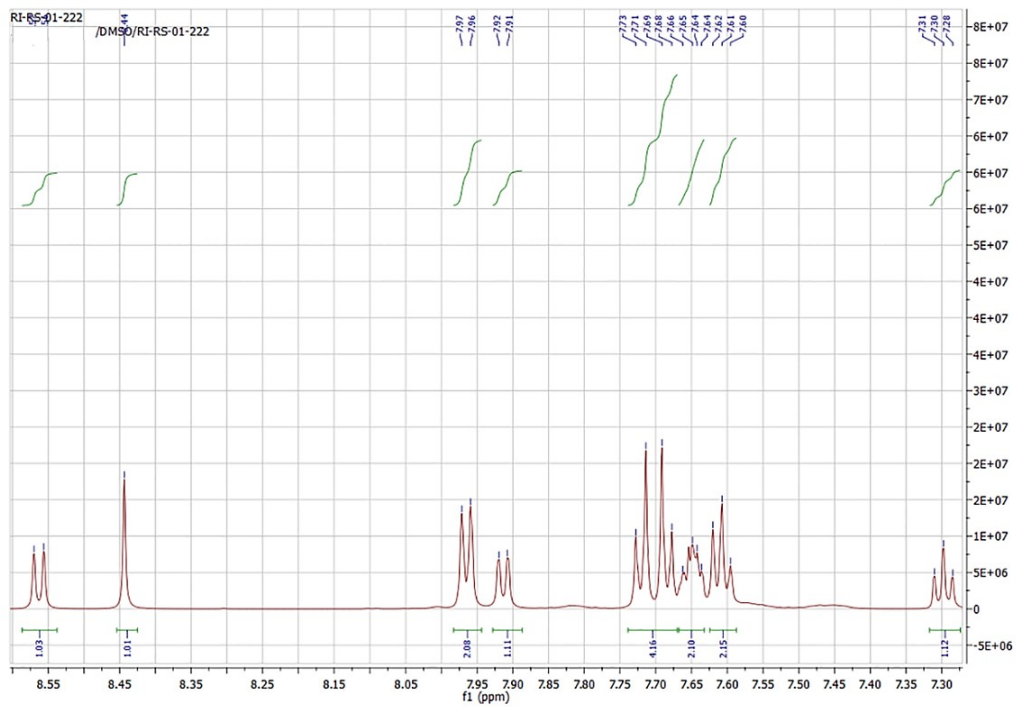

**1HNMR Compound 7**

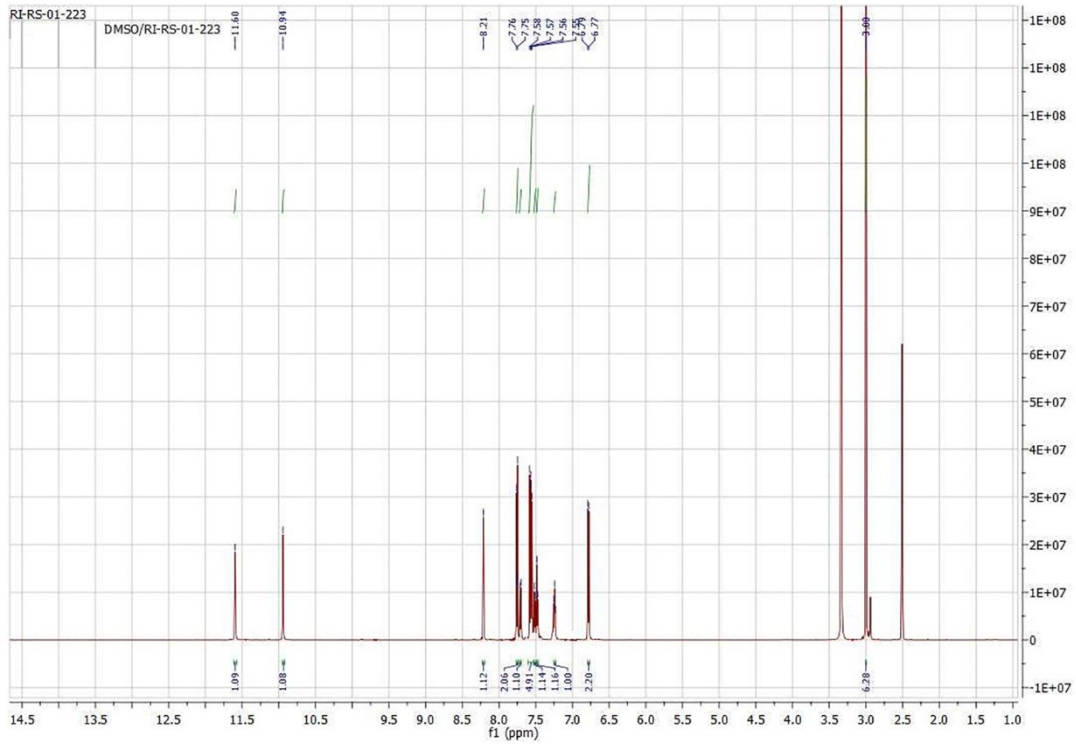

## 1HNMR Compound 7

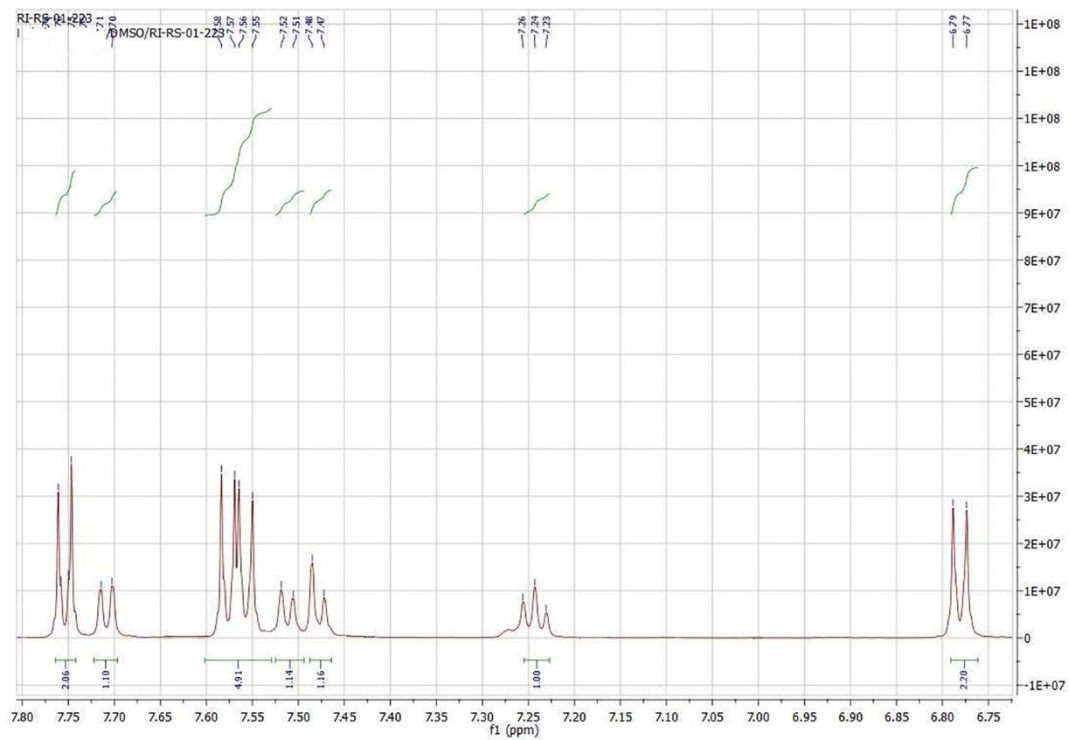





# 1HNMR Compound 9

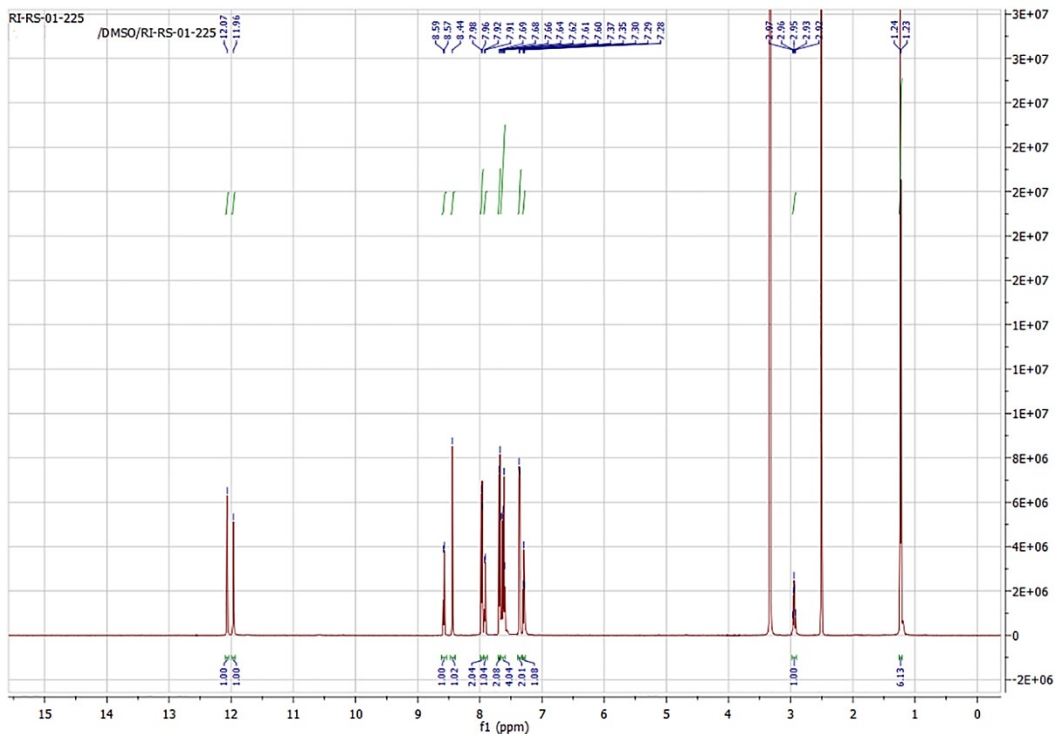

# 1HNMR Compound 9

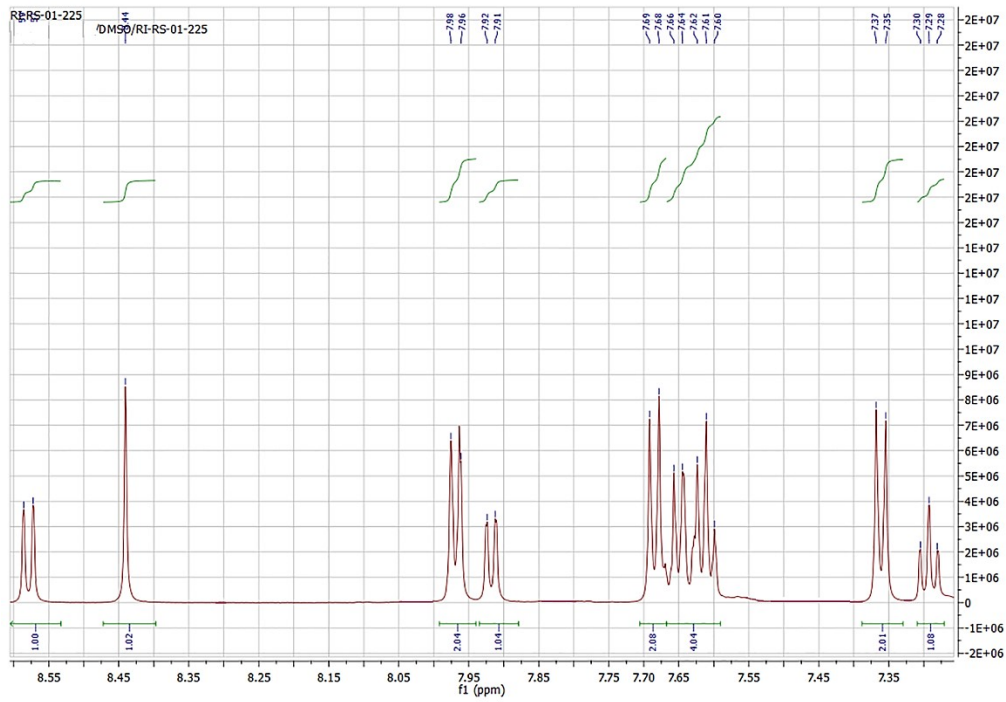

# 1HNMR Compound 10

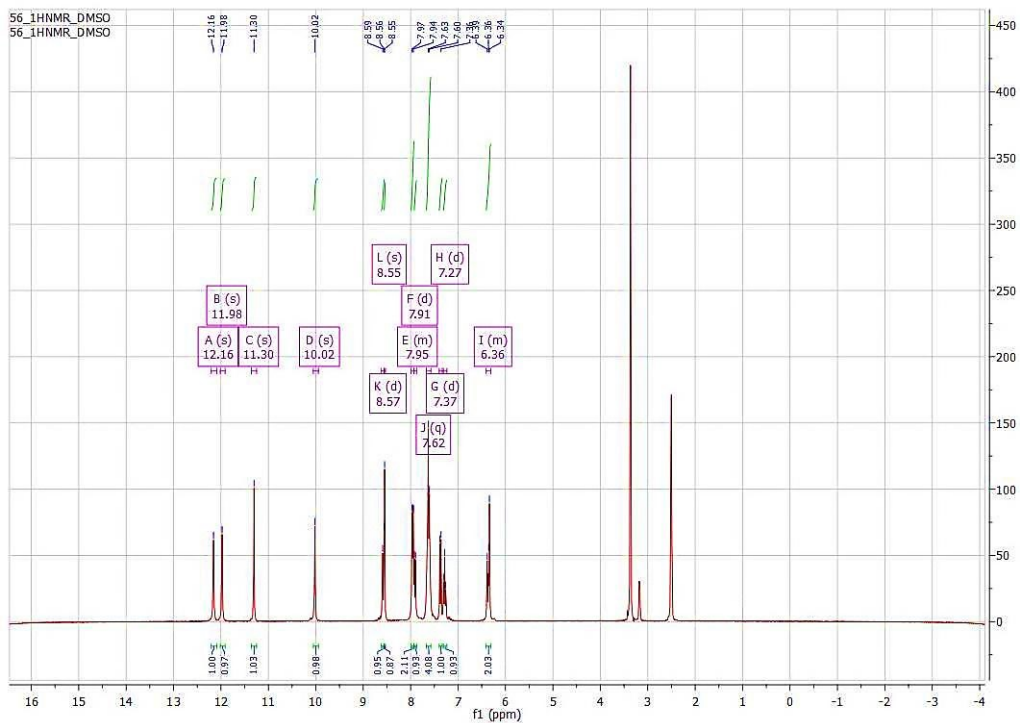

# 1HNMR Compound 10

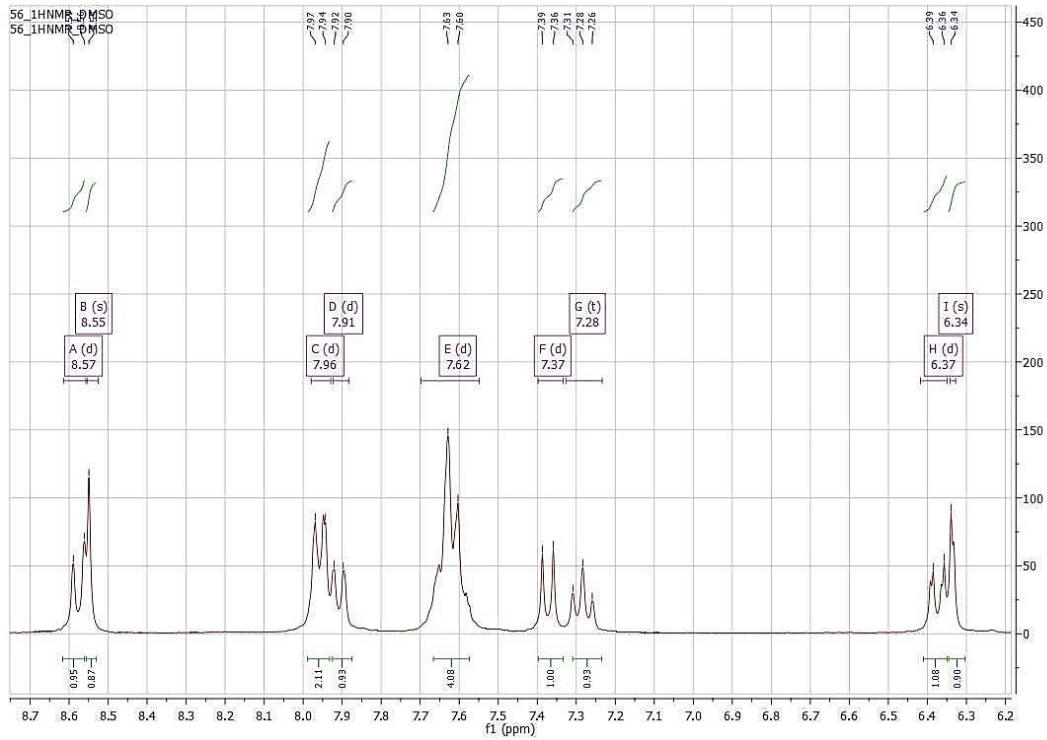

### 1HNMR Compound 11

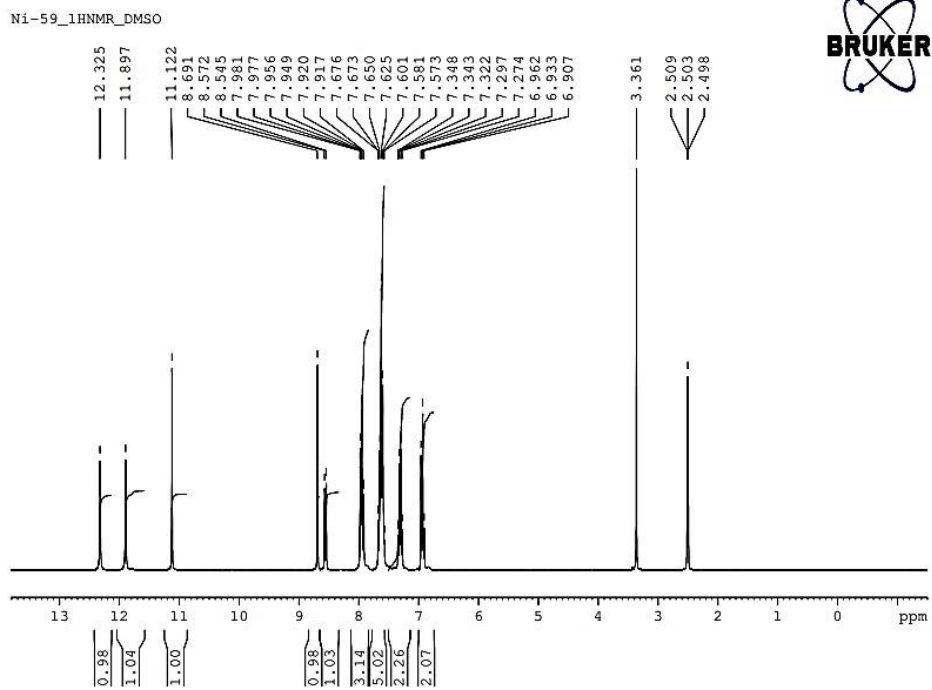

### 1HNMR Compound 11

Ni-59\_1HNMR\_DMSO

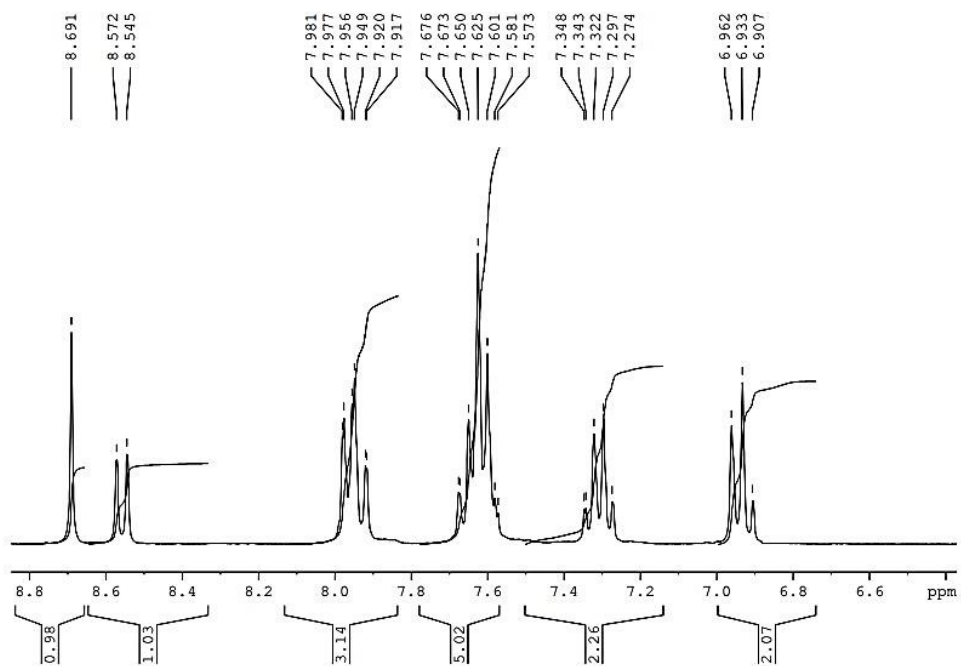

## 1HNMR Compound 12

Ni-63\_1HNMR\_DMSO

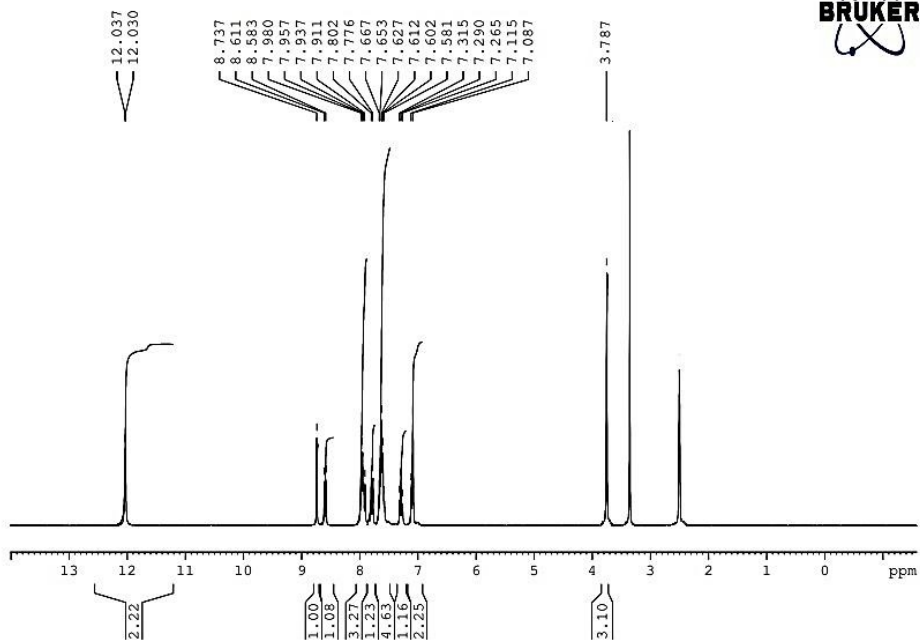

## 1HNMR Compound 12

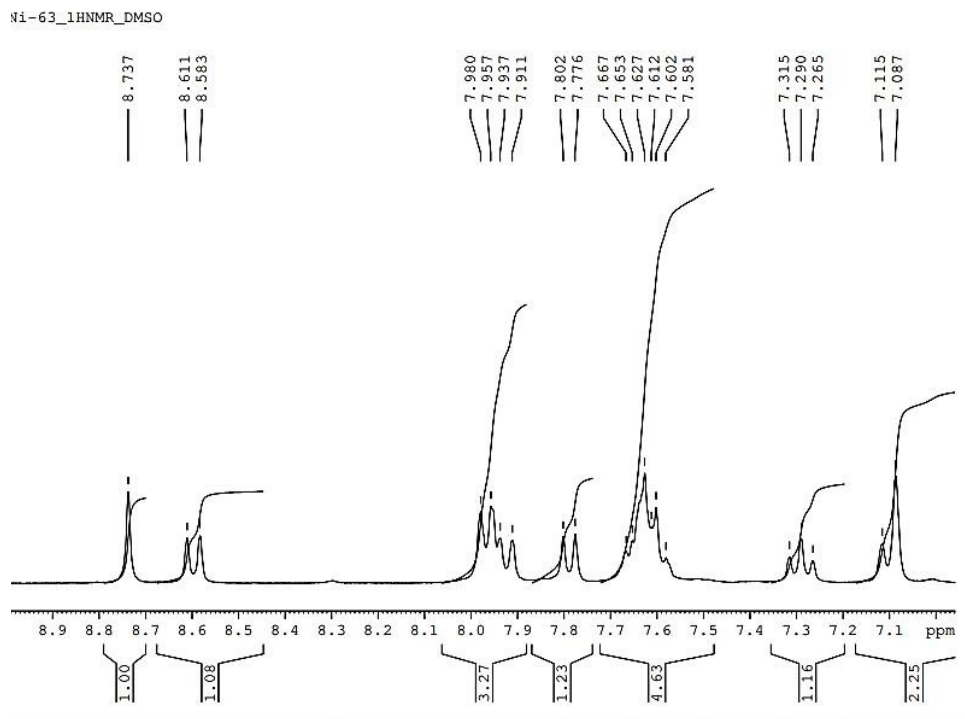

### 1HNMR Compound 13

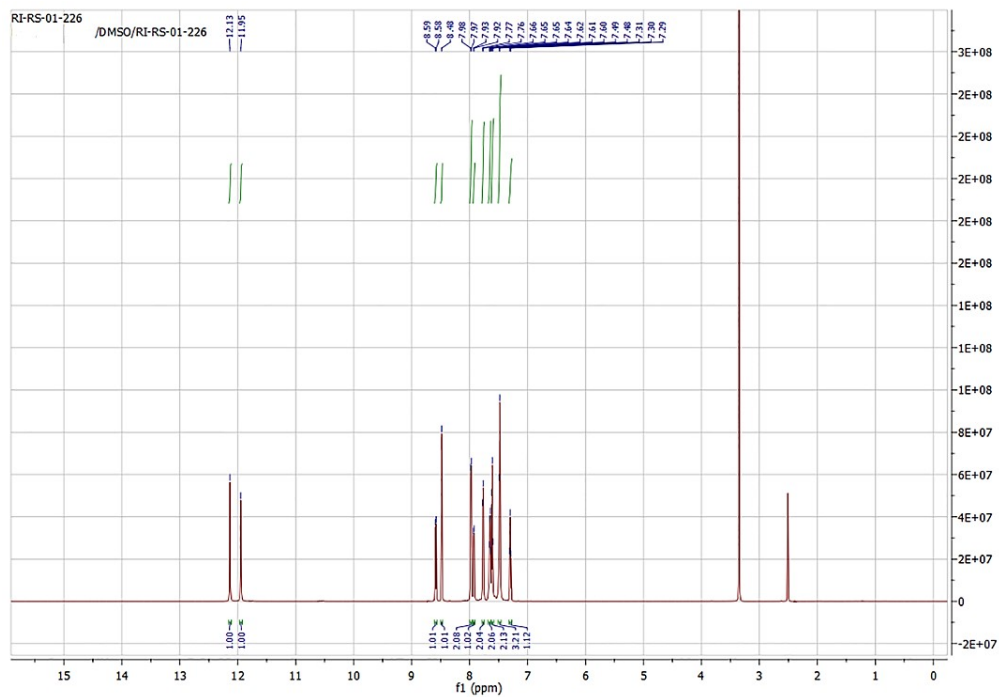

### 1HNMR Compound 13

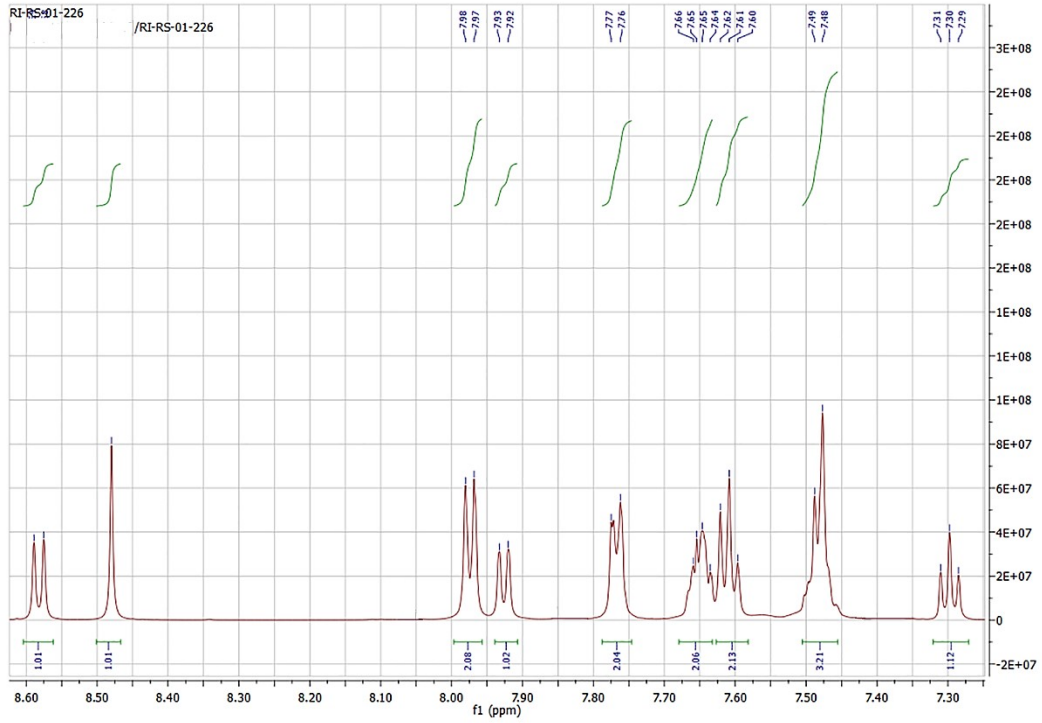

### 13C NMR Compound 5

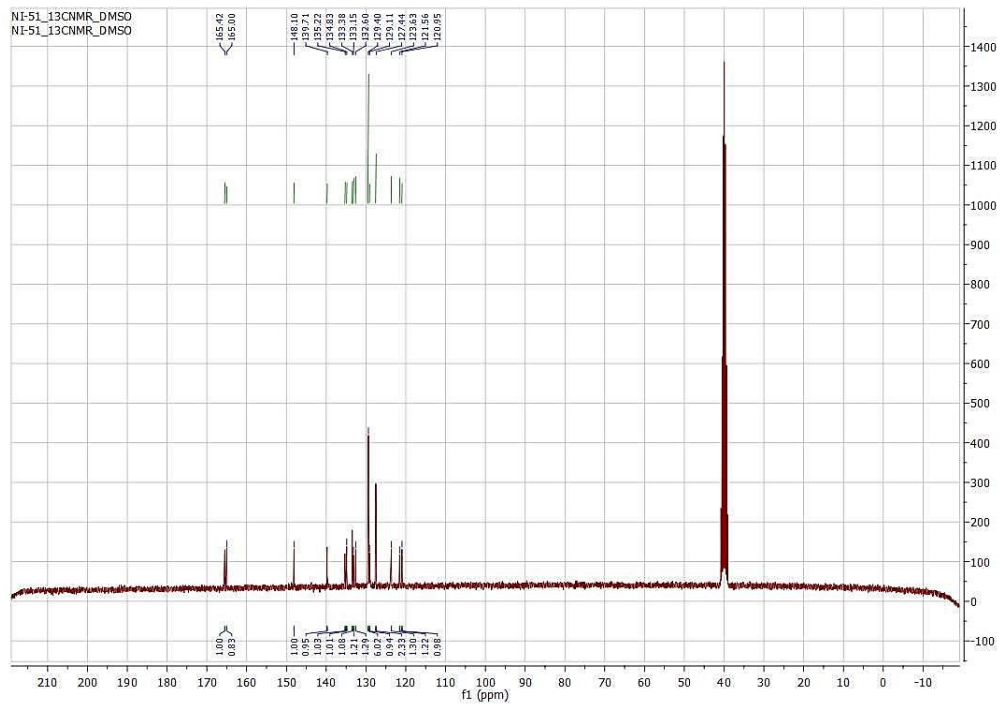

### 13C NMR Compound 5

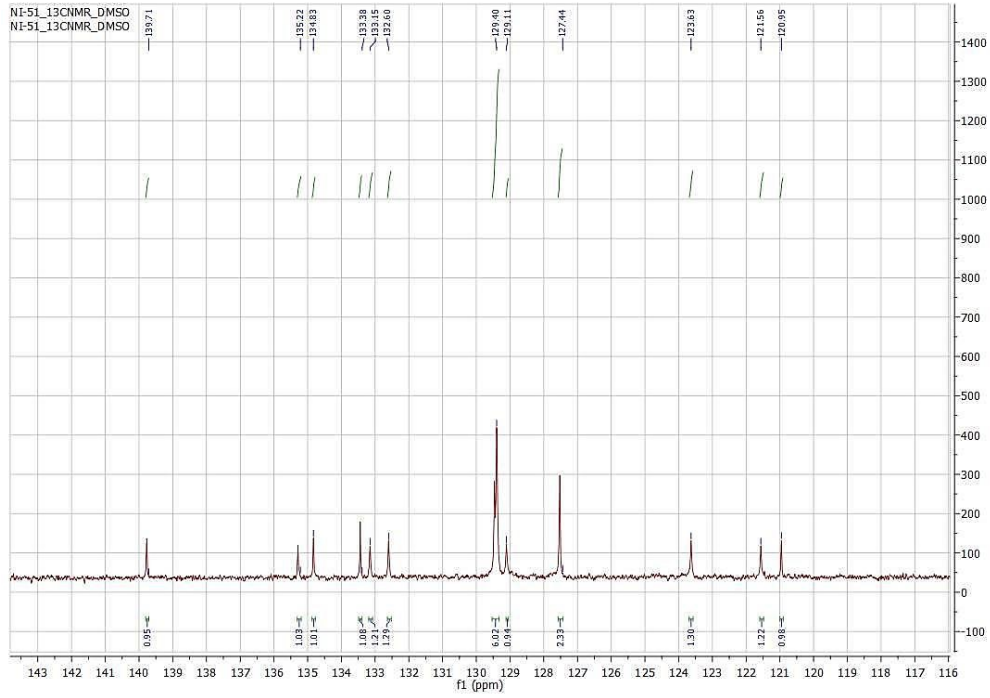

### 13C NMR Compound 6

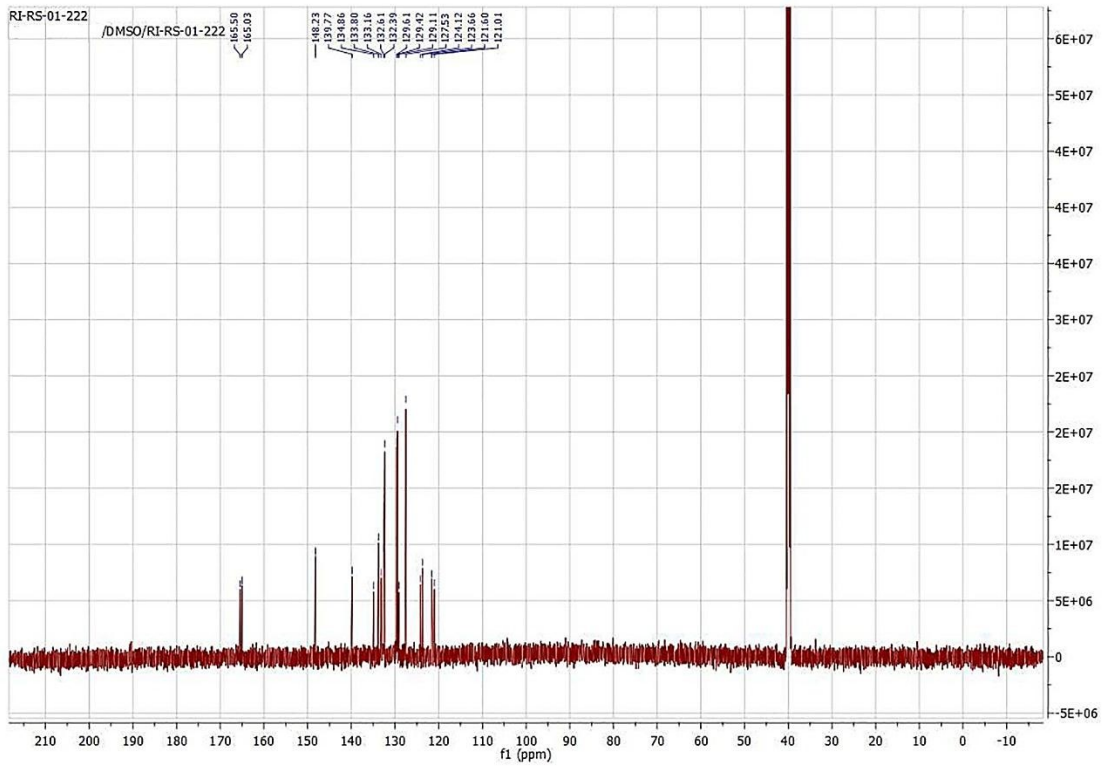

### 13C NMR Compound 6

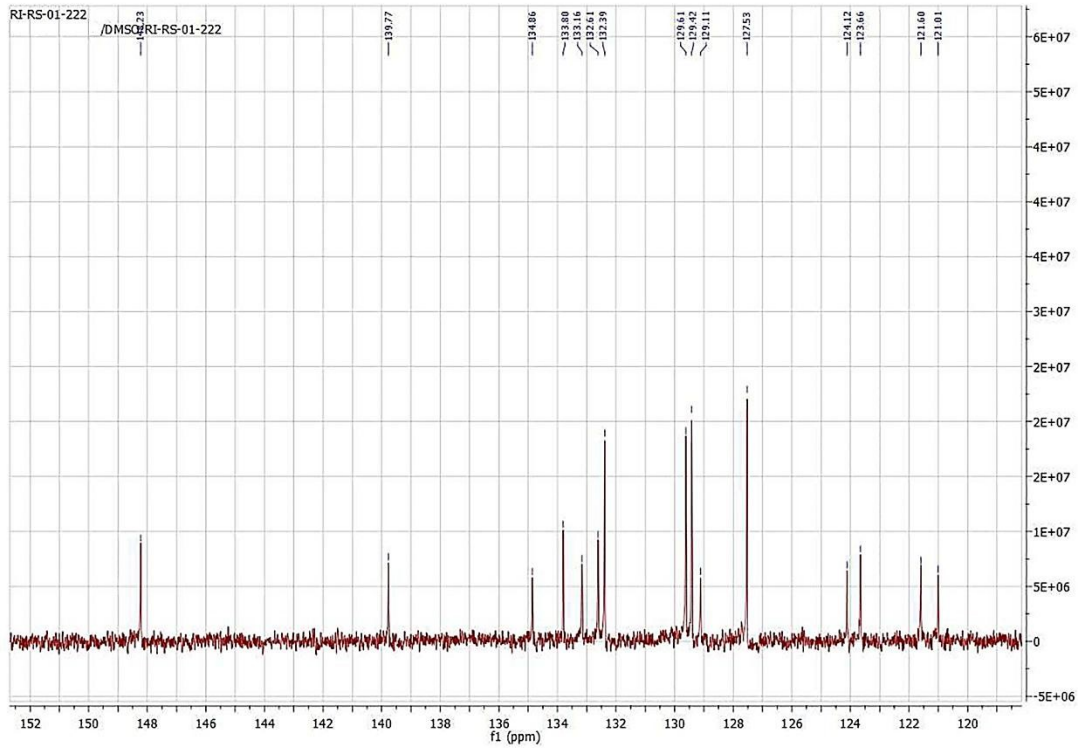

**13C NMR Compound 7**

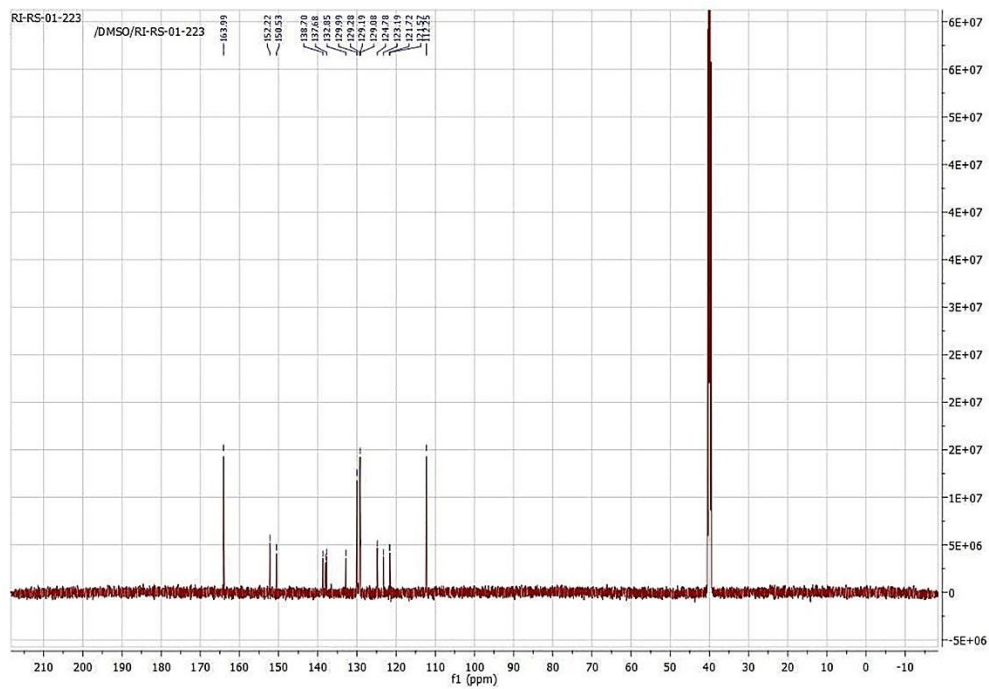

**13C NMR Compound 7**



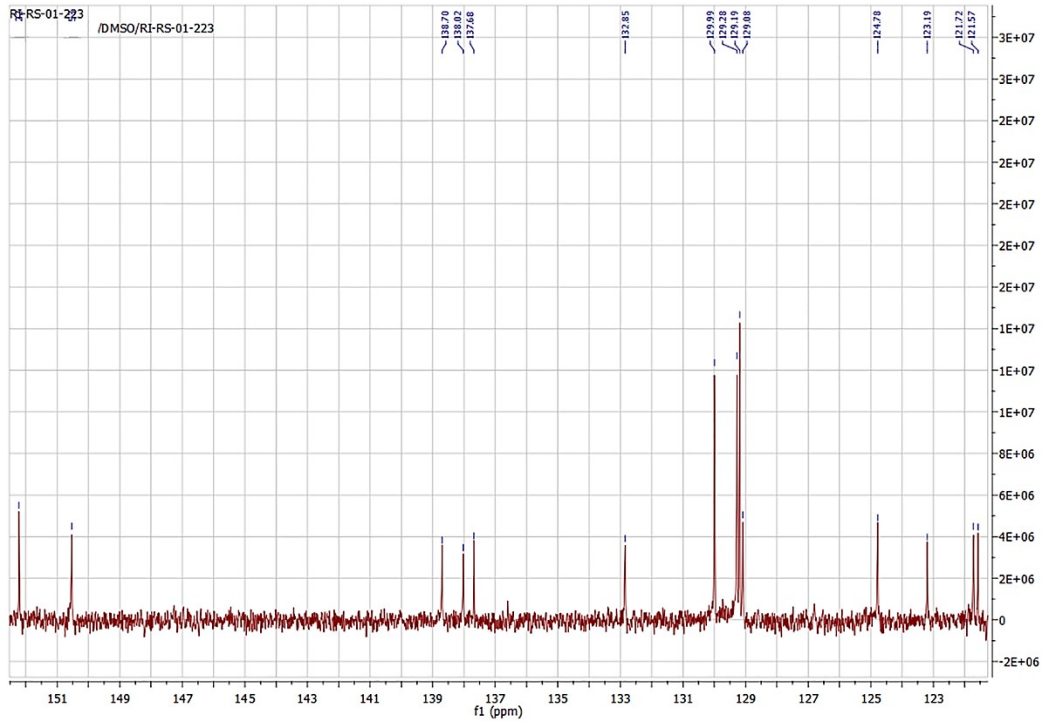

### 13C NMR Compound 8

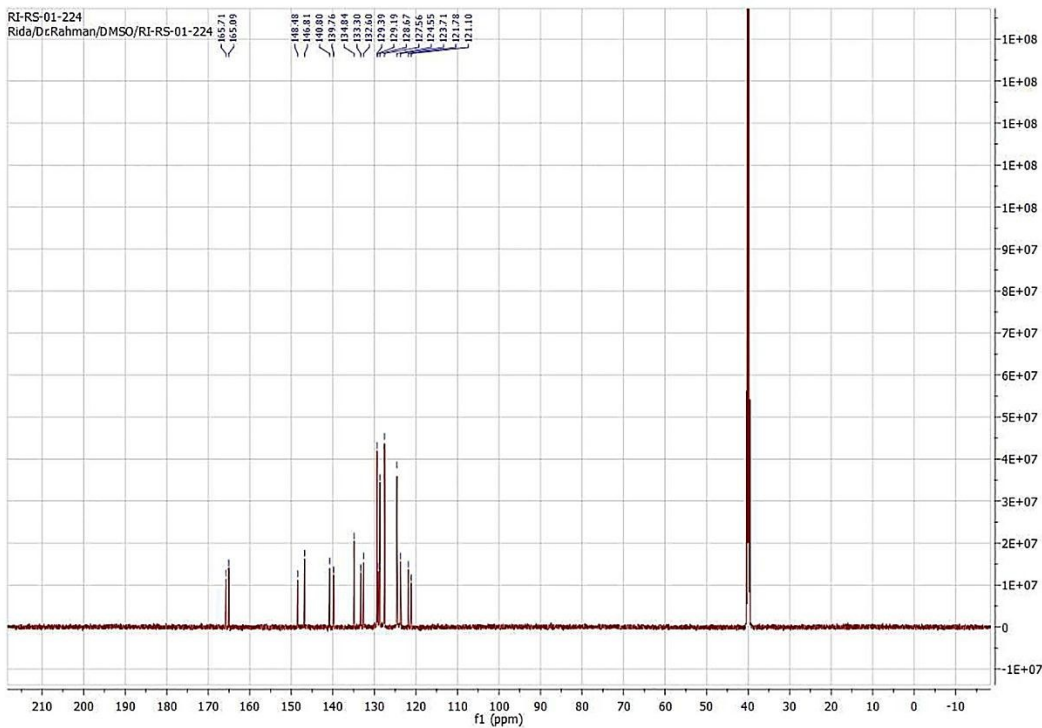

### 13C NMR Compound 8

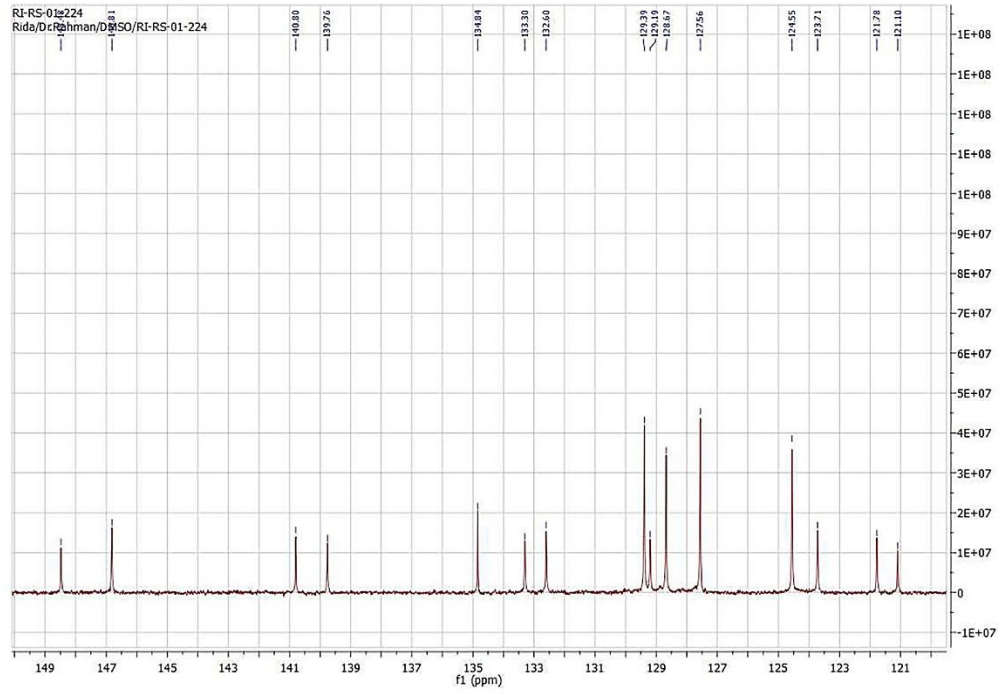

### 13C NMR Compound 9

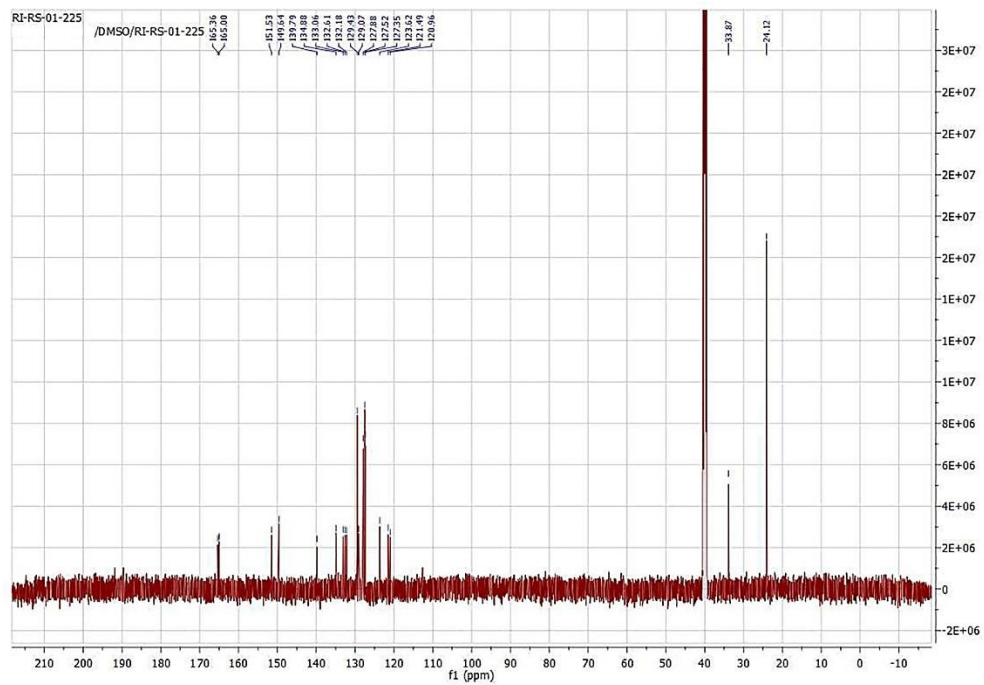

### 13C NMR Compound 9

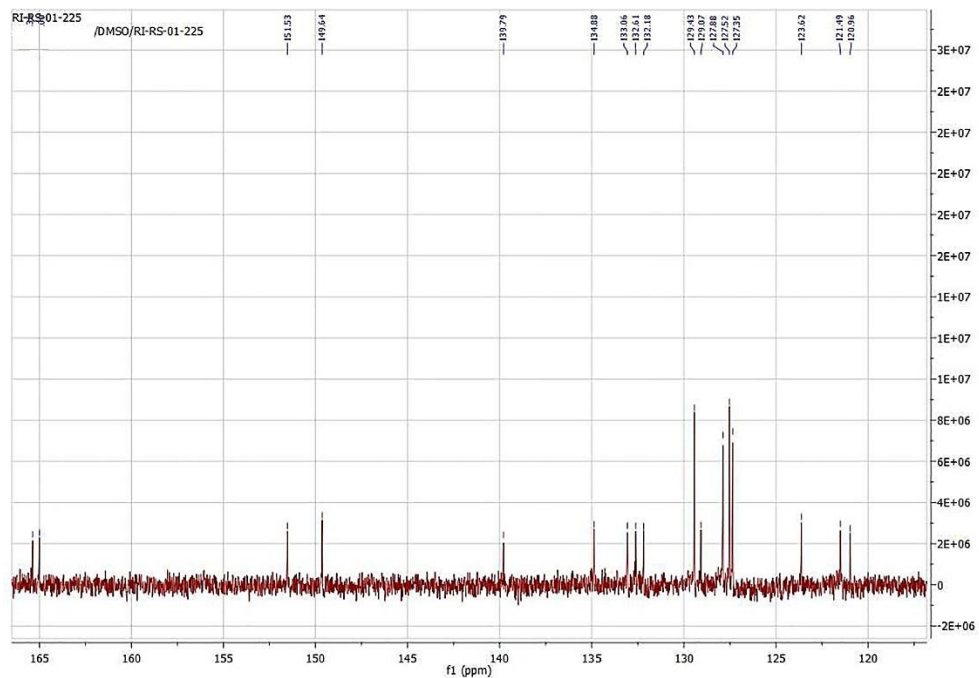

**13C NMR Compound 10**

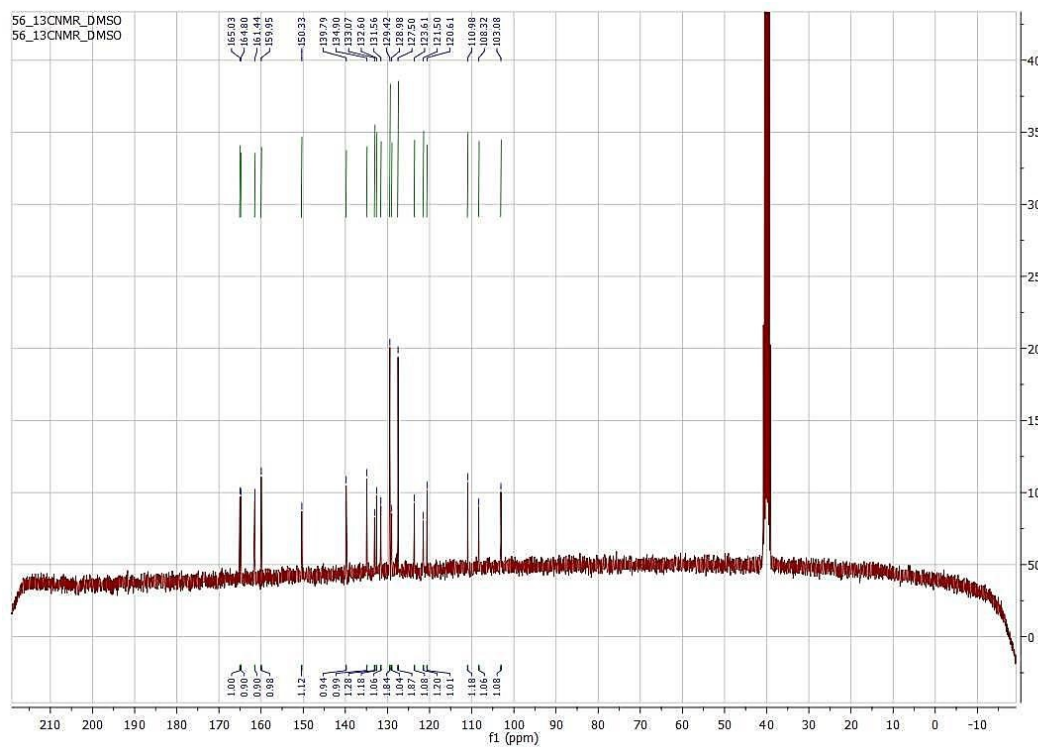

**13C NMR Compound 10**

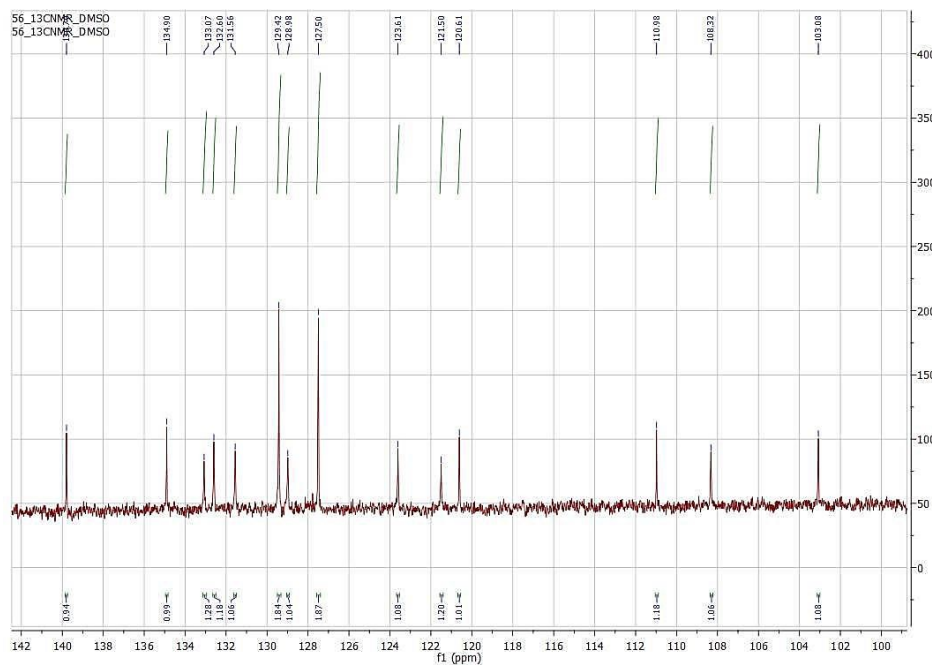

### 13C NMR Compound 11

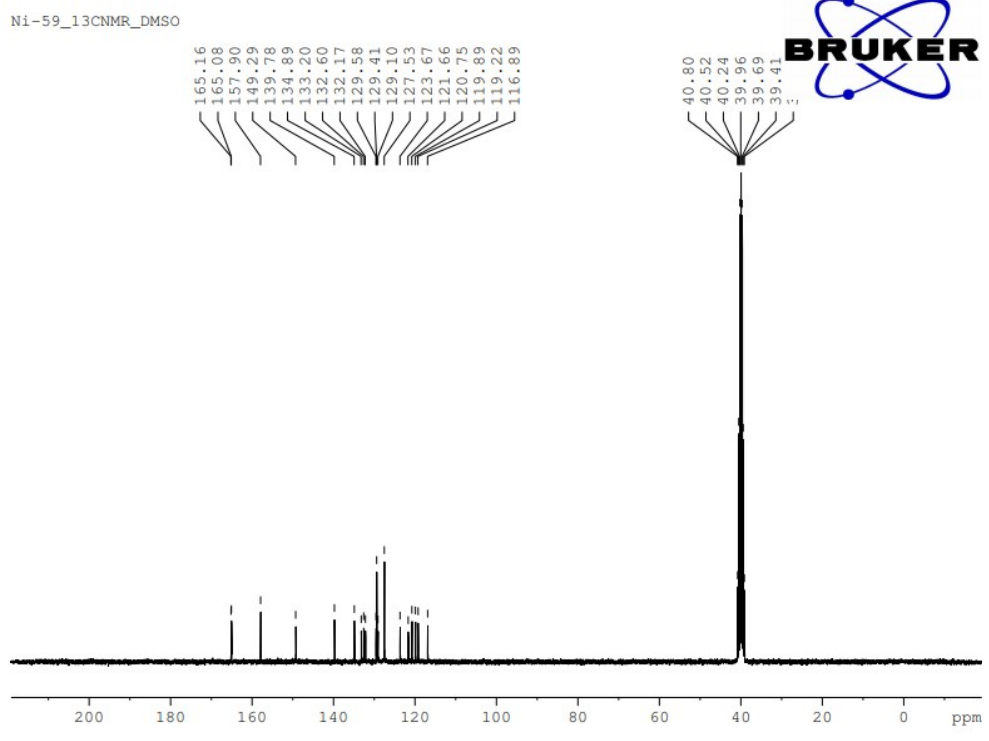

### 13C NMR Compound 11

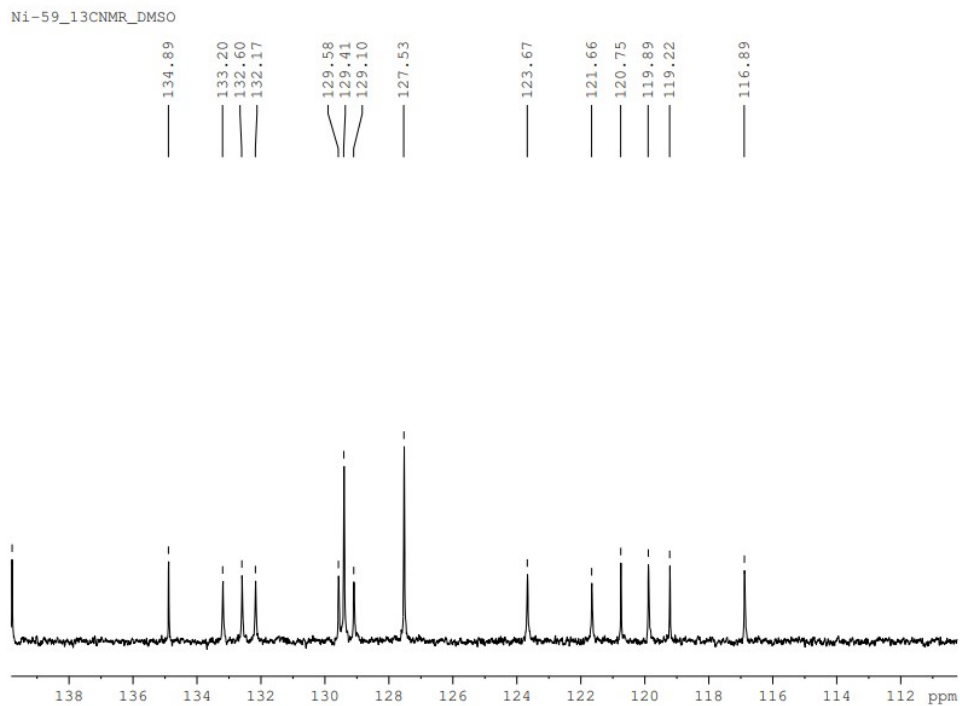

### 13C NMR Compound 12

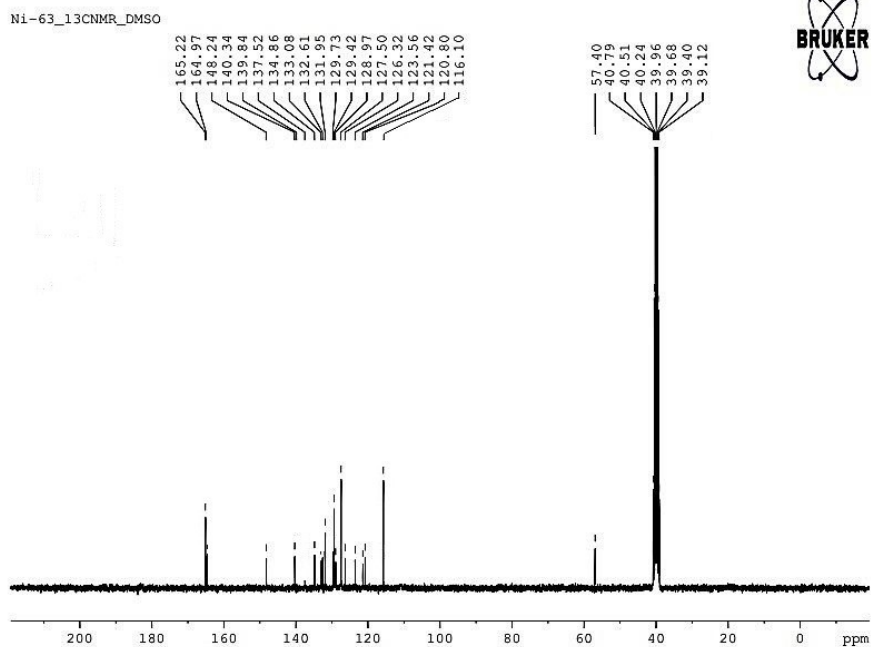

### 13C NMR Compound 12

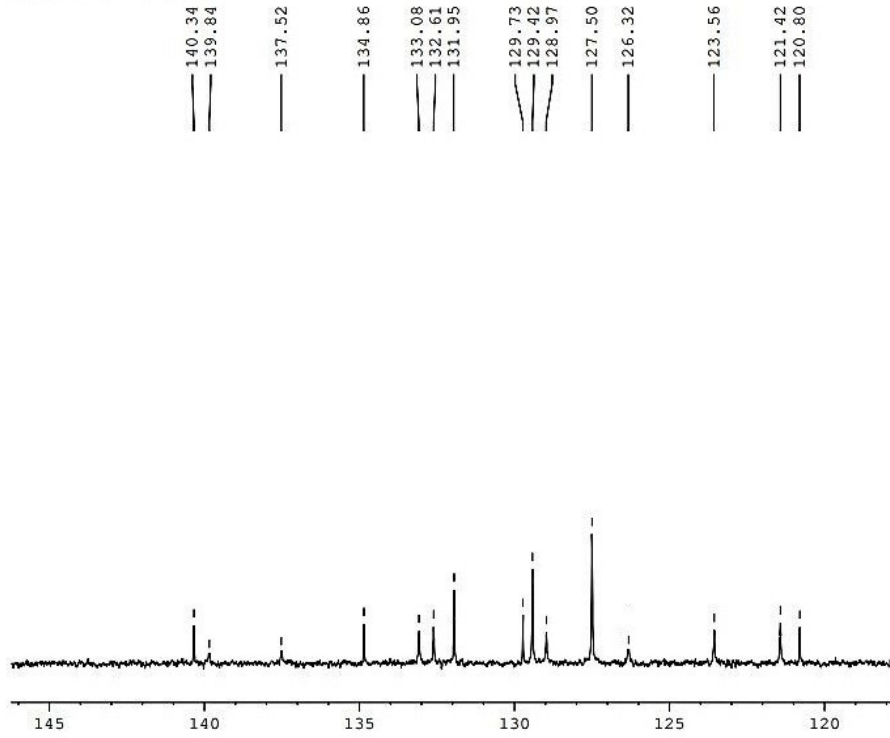

### 13C NMR Compound 13

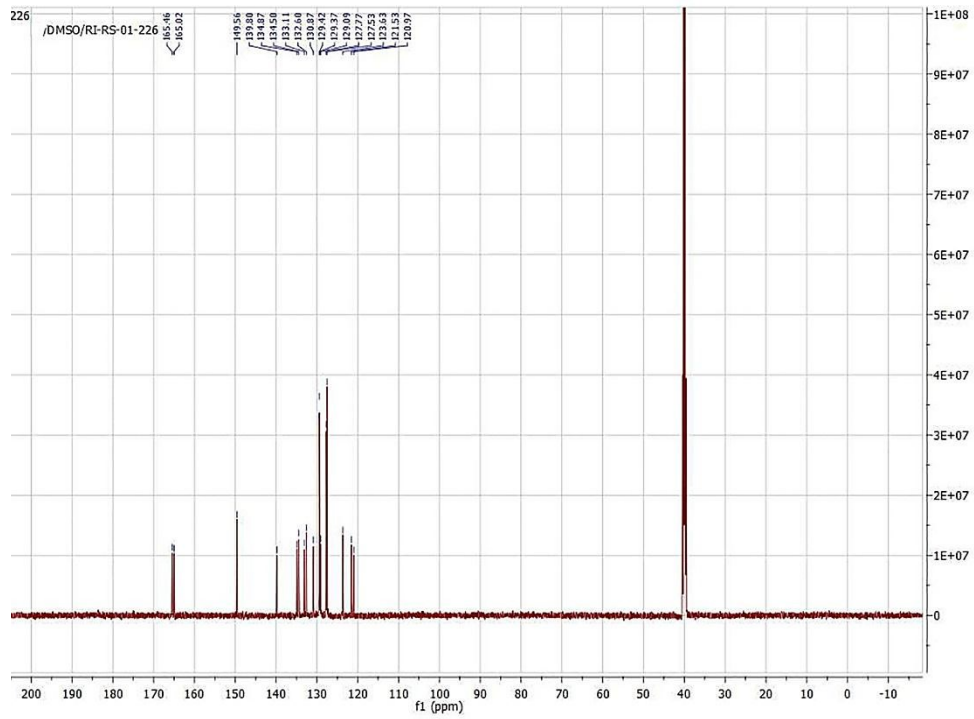

### 13C NMR Compound 13

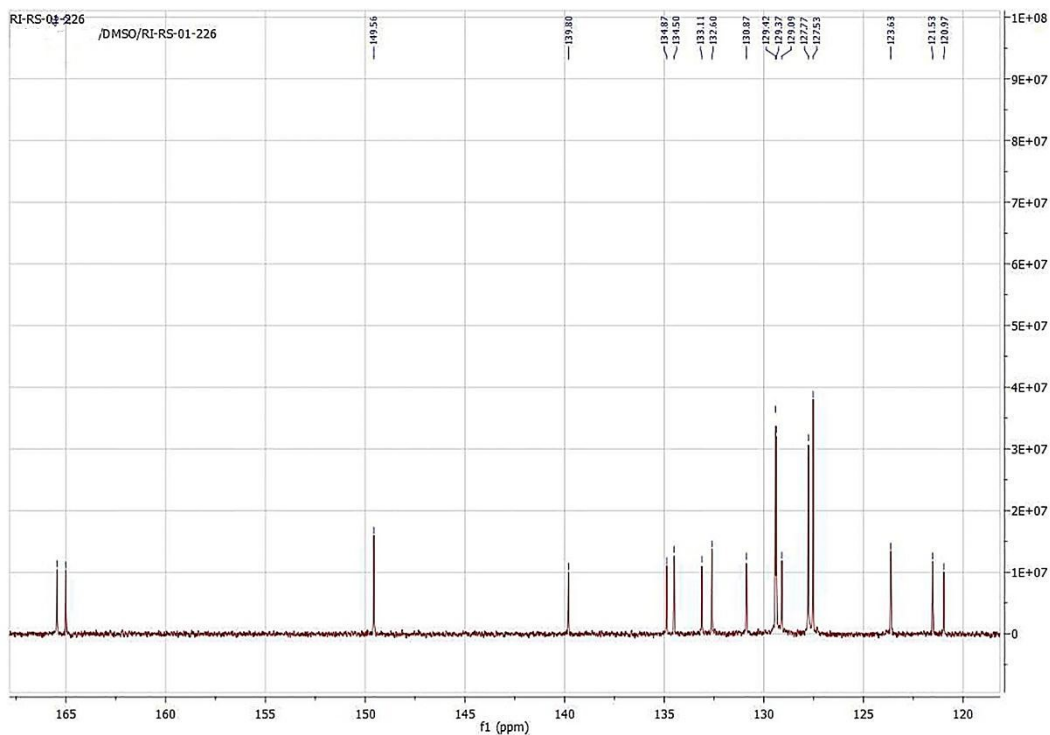

### FTIR Compound 5

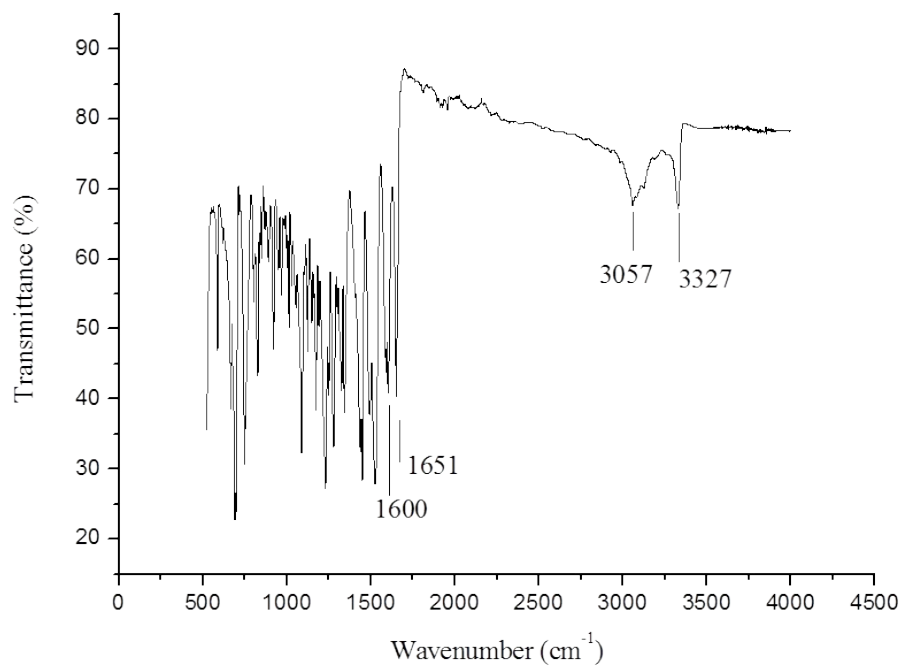

### FTIR Compound 10

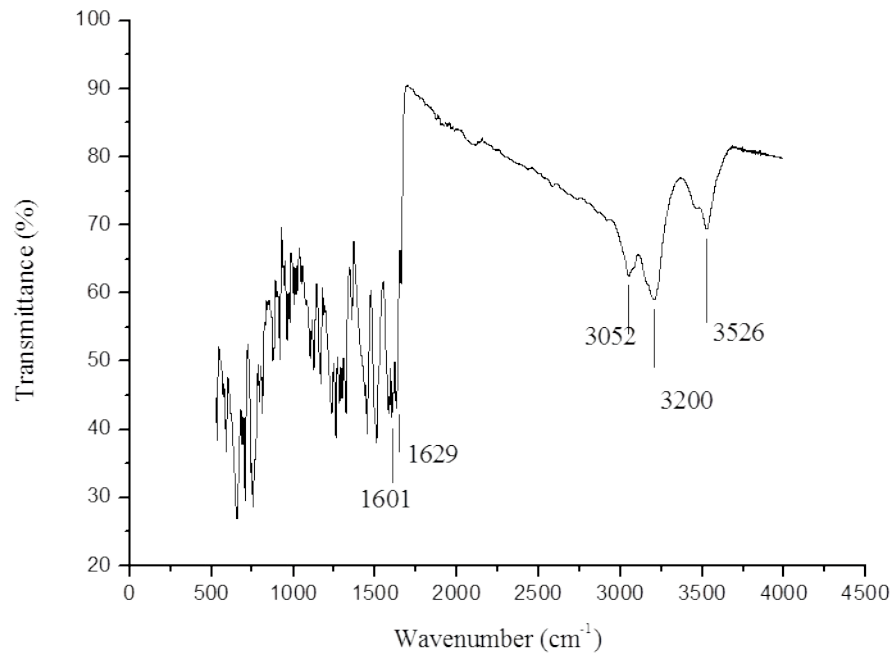

### FTIR Compound 11

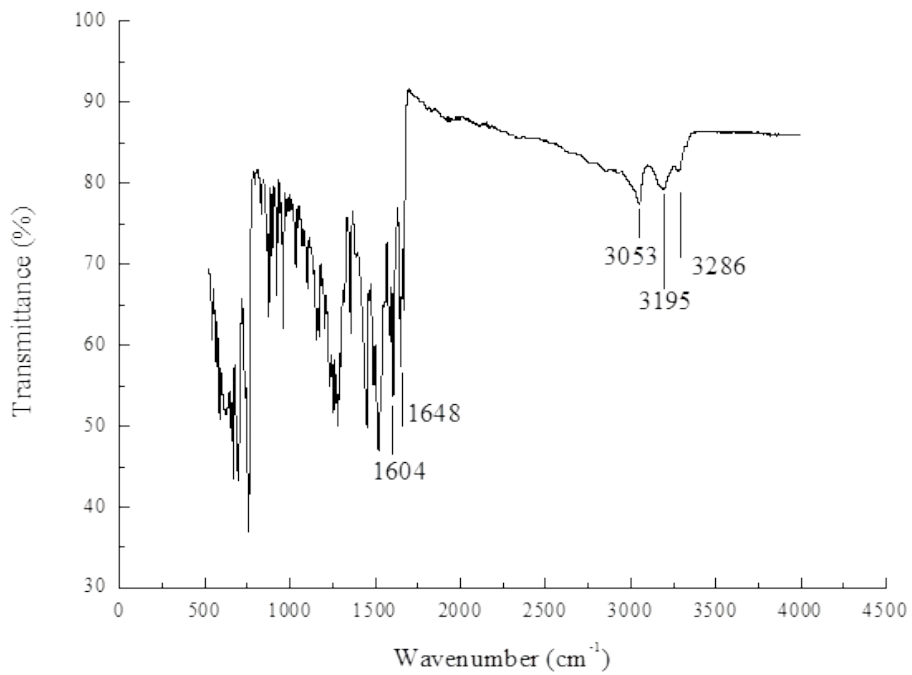

### Mass Spectrum Compound 10



# Sample 7f -Negative-Mode

NI58\_180919130245 #145 RT: 0.48 AV: 1 NL: 1.90E5  
T: ITMS - p ESI Full ms [100.00-800.00]

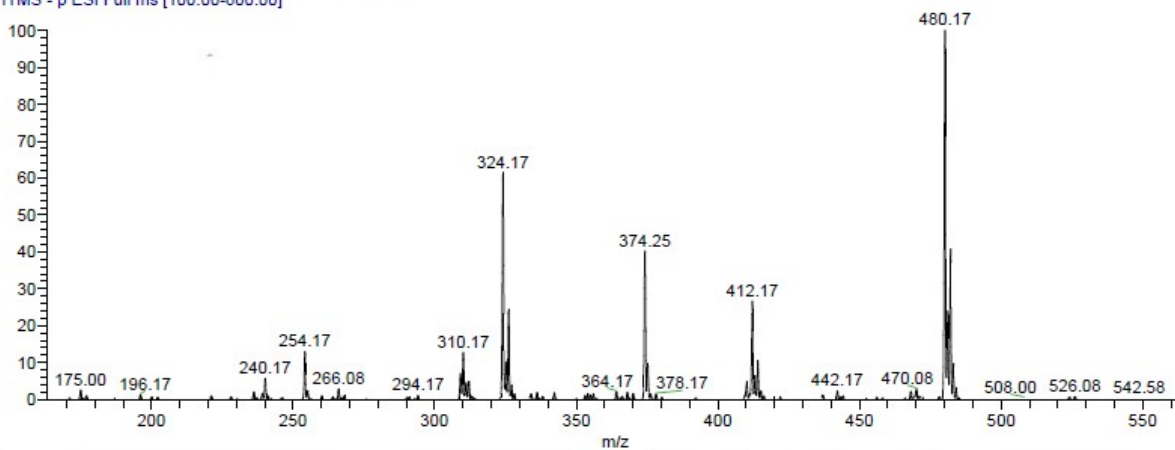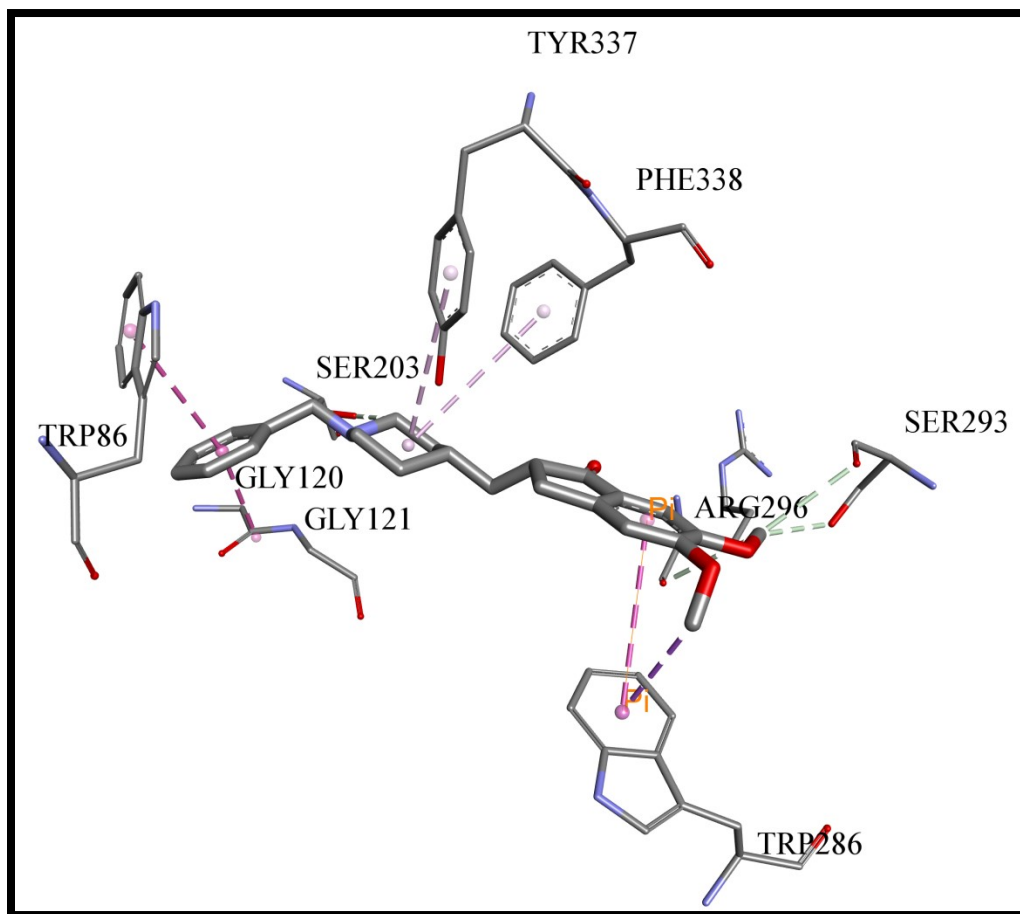

Figure S1: Putative binding approaches of Donepezil inside AChE enzyme
